# Supplementary material for: Engineering of anchor sites and reaction time to efficiently synthesize high loading and stable sub-nanocluster catalysts
Source: Royal Society of Chemistry journal article supplement (doi:10.1039/d2qm00427e), 2022-01-01
Supplement: d2qm00427e1.pdf [file d2qm00427e1.pdf]

## Supporting Information

### **Engineering of anchor sites and metal-support interactions to synthesize high loading and stable sub-nanocluster catalysts**

Di Wu <sup>a</sup>, Dan Zhang <sup>a, b</sup>, Zuochao Wang <sup>a</sup>, Jixiang Xu <sup>a</sup>, Xilei Chen <sup>b</sup>, Jianping Lai <sup>\*, a</sup> and Lei Wang <sup>\*, a, b</sup>

<sup>a</sup> Key Laboratory of Eco-chemical Engineering, Taishan scholar advantage and characteristic discipline team of Eco-chemical process and technology, College of Chemistry and Molecular Engineering, Qingdao University of Science and Technology, Qingdao 266042, P. R. China

<sup>b</sup> Shandong Engineering Research Center for Marine Environment Corrosion and Safety Protection, College of Environment and Safety Engineering, Qingdao University of Science and Technology, Qingdao 266042, P. R. China

## Experimental

### Preparation of Pt/KB-O<sub>S</sub>.

First, 10 mg KB powder, 15 mg K<sub>2</sub>PtCl<sub>6</sub> and 5 mg sucrose were ground in a mortar for 30 min until mixed evenly, and then transferred to a quartz bottle. Then placed in a household microwave oven and reacted for 40 s with a power of 700 W. The obtained sample was denoted as Pt<sub>0.6</sub>/KB-O<sub>S5</sub>-40. What's more, Pt<sub>x</sub>/KB-O<sub>S5</sub>-40 samples with different amount of Pt added were synthesized by the same method except for changing the addition amount of Pt precursor (x=0.4, 0.6, 0.8, which means added 40%, 60% and 80% Pt precursor) By adjusting the type and amount of functional group precursor (y = S5, S20, M5, T5, F5, C5, where S is sucrose, M is melamine, T is thiourea, F is fructose and C is cellulose.), Pt<sub>0.6</sub>/KB-O<sub>F5</sub>-40, Pt<sub>0.6</sub>/KB-O<sub>S5</sub>-40, Pt<sub>0.6</sub>/KB-O<sub>C5</sub>-40, Pt<sub>0.6</sub>/KB-O<sub>M5</sub>-40, Pt<sub>0.6</sub>/KB-O<sub>T5</sub>-40 were obtained. The catalyst when sucrose is added at 0 is denoted Pt<sub>0.6</sub>/KB-40. By adjusting the reaction time (20 s, 40 s and 60 s), Pt<sub>0.6</sub>/KB-O<sub>S5</sub>-20, Pt<sub>0.6</sub>/KB-O<sub>S5</sub>-40 and Pt<sub>0.6</sub>/KB-O<sub>S5</sub>-60 were obtained.

### Preparation of Pt<sub>0.6</sub>/CNT-O<sub>S5</sub>-40 and Pt<sub>0.6</sub>/rGO-O<sub>S5</sub>-40.

First, 10 mg of MWCNT, 15 mg K<sub>2</sub>PtCl<sub>6</sub> and 5 mg sucrose were ground in a mortar for 30 min until the mixture was evenly mixed. Then the mixture was transferred to a quartz bottle and reacted for 40 s with a power of 700 W. The material obtained was named as Pt<sub>0.6</sub>/CNT-O<sub>S5</sub>-40. Pt<sub>0.6</sub>/rGO-O<sub>S5</sub>-40 was synthesized by the same method except for changing the MWCNT to rGO.

### Preparation of Pd<sub>0.6</sub>/KB-O<sub>S5</sub>-40 and Ru<sub>0.6</sub>/KB-O<sub>S5</sub>-40.

The synthesis method of Pd<sub>0.6</sub>/KB-O<sub>S5</sub>-40 and Ru<sub>0.6</sub>/KB-O<sub>S5</sub>-40 is the same as that of Pt<sub>0.6</sub>/KB-O<sub>S5</sub>-40, except that PdCl<sub>2</sub> and RuCl<sub>3</sub> replace K<sub>2</sub>PtCl<sub>6</sub> respectively.

## Electrochemical measurements.

Electrochemical characterization was carried out in a conventional three-electrode cell of a CHI-760E Electrochemical Workstation (Shanghai Chenhua Instrument Corporation, China) at room temperature. Ag/AgCl electrode and carbon rod were used as reference electrode and counter electrode respectively. All potentials were calibrated *vs* reversible hydrogen electrode (RHE) using the equation:

$$E_{\text{RHE}} = E_{\text{Ag/AgCl}} + 0.059 \text{ pH} + E^0_{\text{Ag/AgCl}}$$

Where  $E_{\text{RHE}}$  is the potential *vs*. RHE,  $E_{\text{Ag/AgCl}}$  is the experimentally measured potential against the Ag/AgCl reference electrode, and  $E^0_{\text{Ag/AgCl}}$  is the standard potential of Ag/AgCl at 25 °C (0.199 V).

The glassy carbon electrode (GCE, diameter: 3 mm, area: 0.07065 cm<sup>2</sup>) was used as the working electrode. Catalyst ink was prepared by suspending 5 mg of catalyst powder in a 1 mL solution consisting of 5 wt% Nafion and ethanol (v: v=1:100). The catalyst ink obtained was supersonic treated for 30 minutes in room temperature in order to disperse evenly. Prior to dipping into the ink, the GCE was polished by Al<sub>2</sub>O<sub>3</sub> powder to clean the surface. In a N<sub>2</sub>-saturated 0.5 M H<sub>2</sub>SO<sub>4</sub> solution, Linear sweep voltammetry (LSV) was carried out at a sweep rate of 5 mV s<sup>-1</sup>. All catalysts need to be cyclic voltammetry (CV) activated before LSV testing. All polarization curves were corrected for 95% iR. The durability test was in 0.5 M H<sub>2</sub>SO<sub>4</sub> solution using chronoamperometry. The ECSA can be derived using the formula:  $\text{ECSA} = S_{\text{geo}} * C_{\text{dl}}/C_{\text{s}}$  via  $C_{\text{dl}}$ , wherein,  $C_{\text{s}}$  is the specific electrochemical double layer capacitance, its value in acidic environments is 0.040 mF cm<sup>-2</sup>, and  $S$  is the geometric surface area of the working electrode. The electrochemical impedance spectroscopy (EIS) measurement was performed over a frequency range of 0.1 Hz to 100 kHz.

## Supplementary Figures and Tables

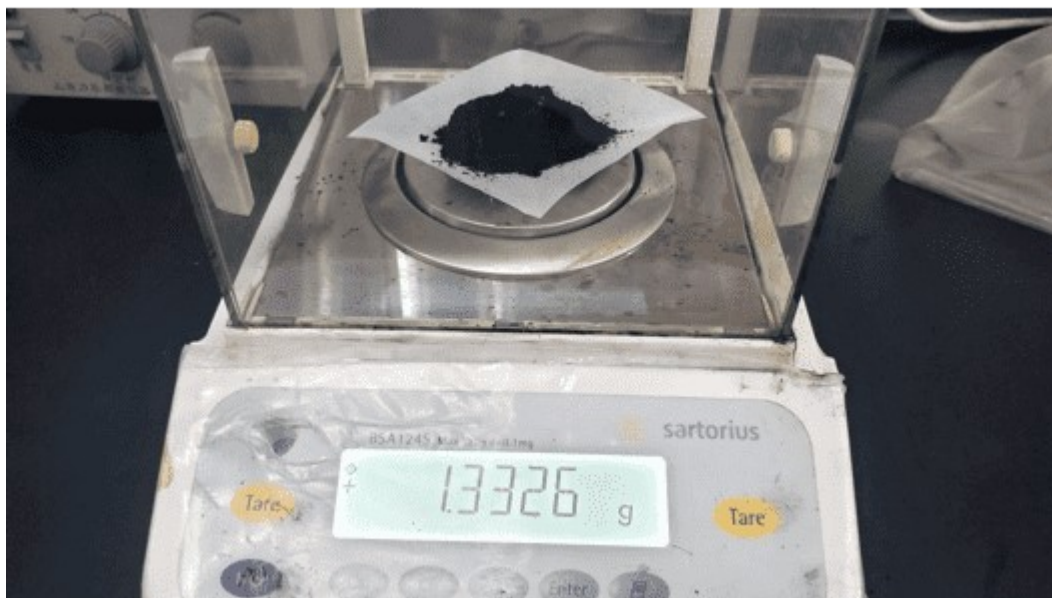

**Figure S1.** Photograph of catalyst yield after increasing the amount of reactants.

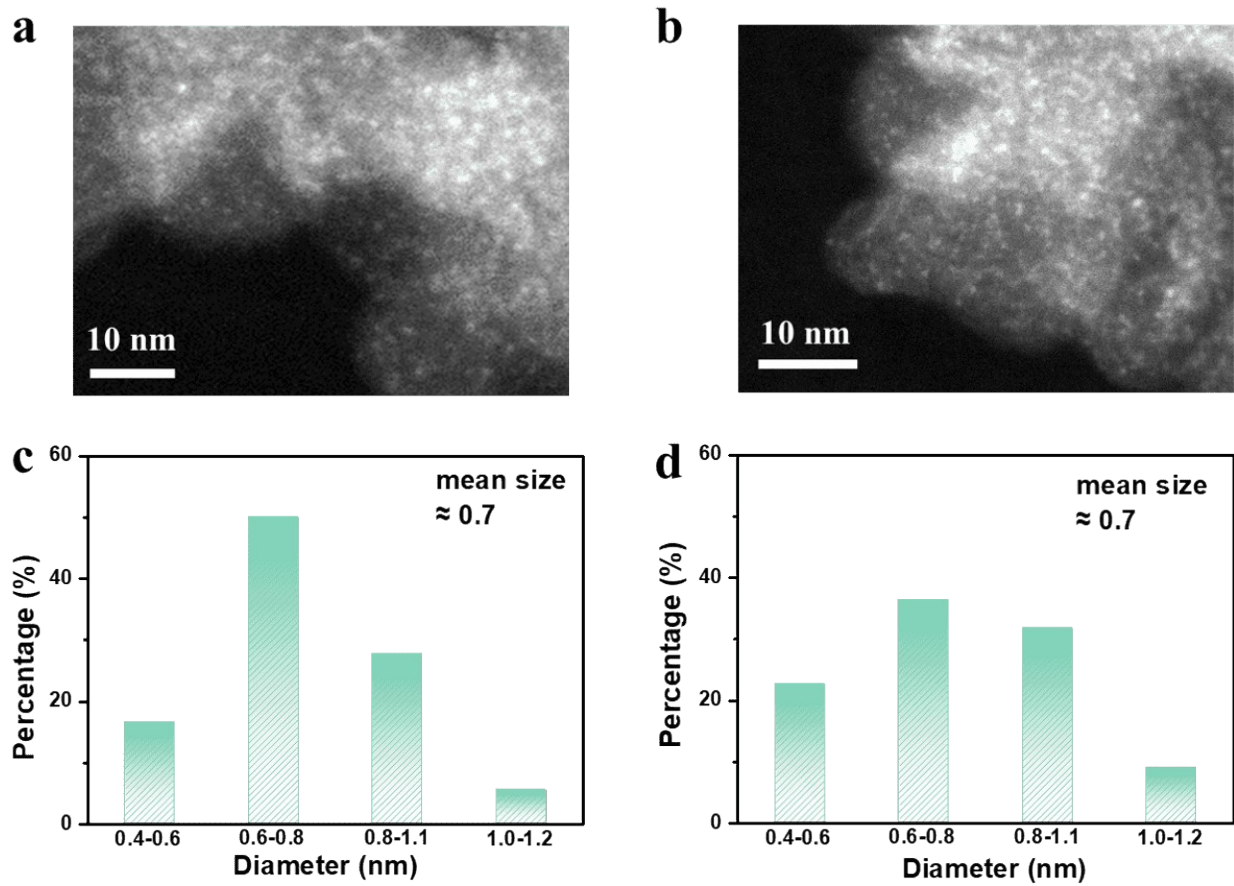

**Figure S2.** (a), (b) HAADF-STEM images for the  $\text{Pt}_{0.6}/\text{KB-O}_{\text{S5-40}}$  at other regions and (c), (d) corresponding size distributions for the  $\text{Pt}_{0.6}/\text{KB-O}_{\text{S5-40}}$ .

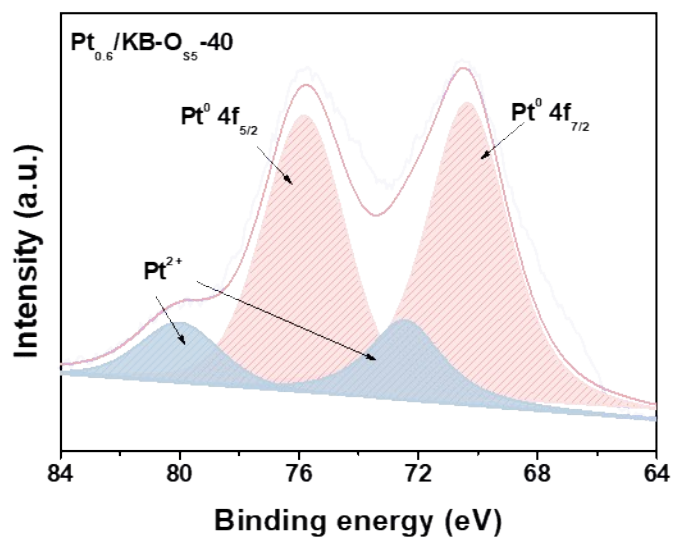

**Figure S3.** High-resolution Pt 4f XPS spectrum for Pt<sub>0.6</sub>/KB-O<sub>SS</sub>-40.

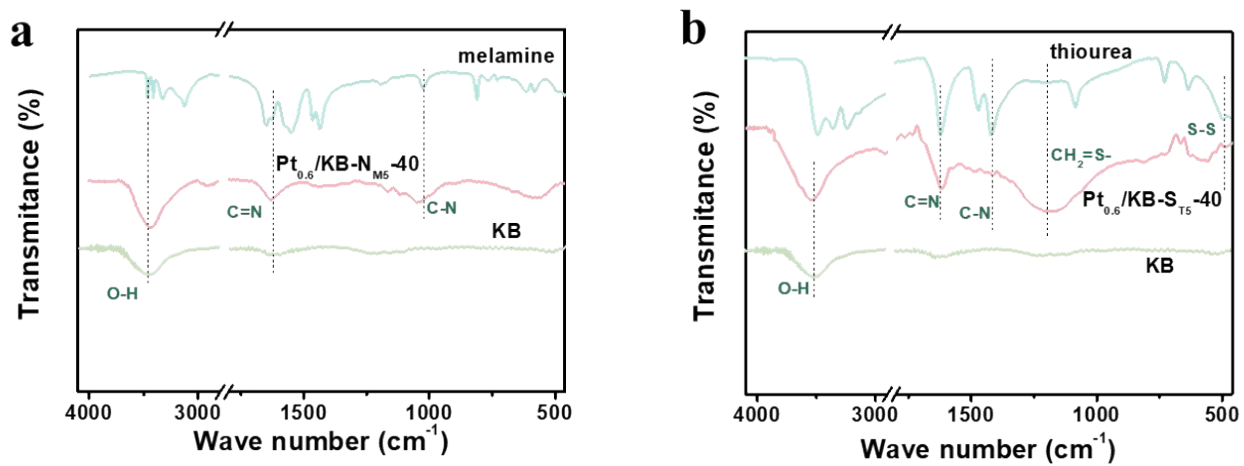

**Figure S4.** FTIR spectra of (a) Pt<sub>0.6</sub>/KB-N<sub>M5</sub>-40 and (b) Pt<sub>0.6</sub>/KB-S<sub>T5</sub>-40.

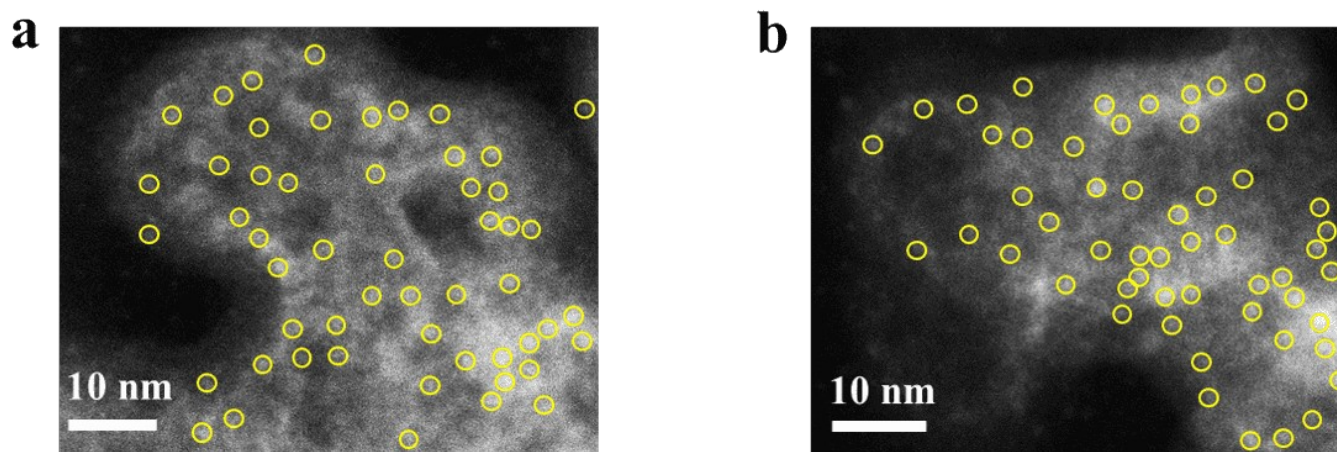

**Figure S5.** HRTEM images of (a)  $\text{Pt}_{0.6}/\text{KB-N}_{\text{M5}}\text{-40}$  and (b)  $\text{Pt}_{0.6}/\text{KB-S}_{\text{T5}}\text{-40}$ .

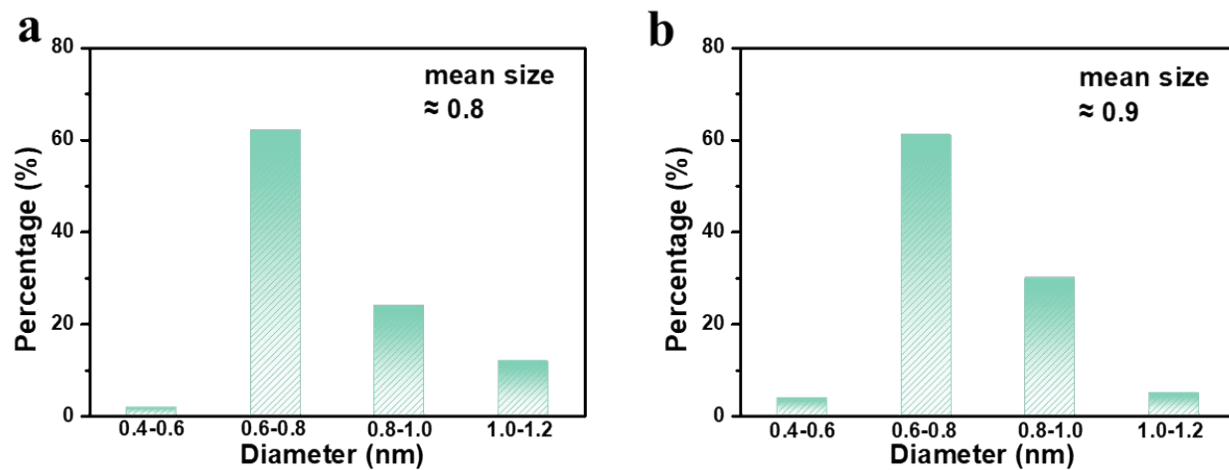

**Figure S6.** Corresponding size distributions for the (c)  $\text{Pt}_{0.6}/\text{KB-N}_{\text{M5}}\text{-40}$  and (d)  $\text{Pt}_{0.6}/\text{KB-S}_{\text{T5}}\text{-40}$ .

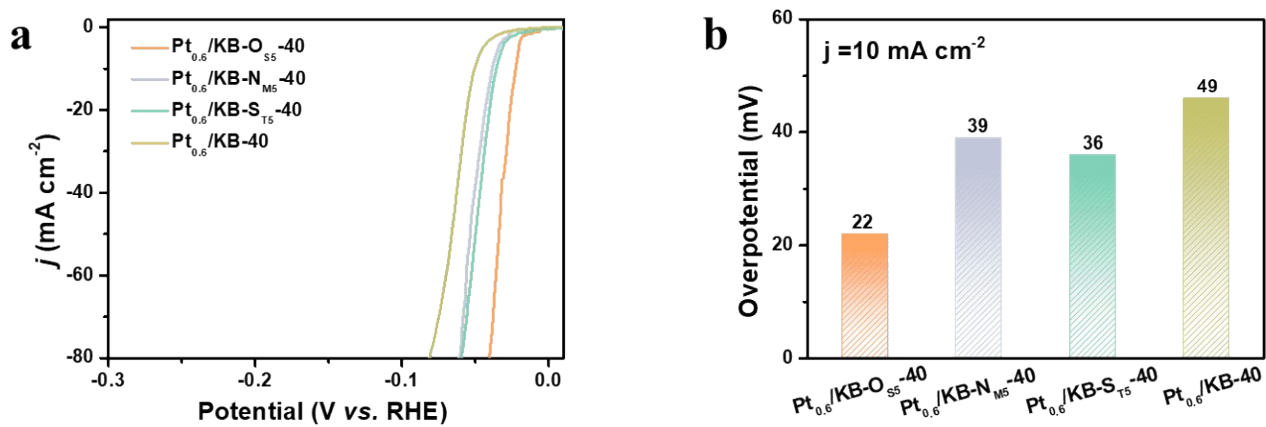

**Figure S7.** (a) LSV curves of Pt<sub>0.6</sub>/KB-O<sub>S5</sub>-40, Pt<sub>0.6</sub>/KB-N<sub>M5</sub>-40, Pt<sub>0.6</sub>/KB-S<sub>T5</sub>-40 and Pt<sub>0.6</sub>/KB-40 in a N<sub>2</sub>-saturated 0.5 M H<sub>2</sub>SO<sub>4</sub>. (b) Comparison  $\eta_{10}$  of Pt<sub>0.6</sub>/KB-O<sub>S5</sub>-40, Pt<sub>0.6</sub>/KB-N<sub>M5</sub>-40, Pt<sub>0.6</sub>/KB-S<sub>T5</sub>-40 and Pt<sub>0.6</sub>/KB-40.

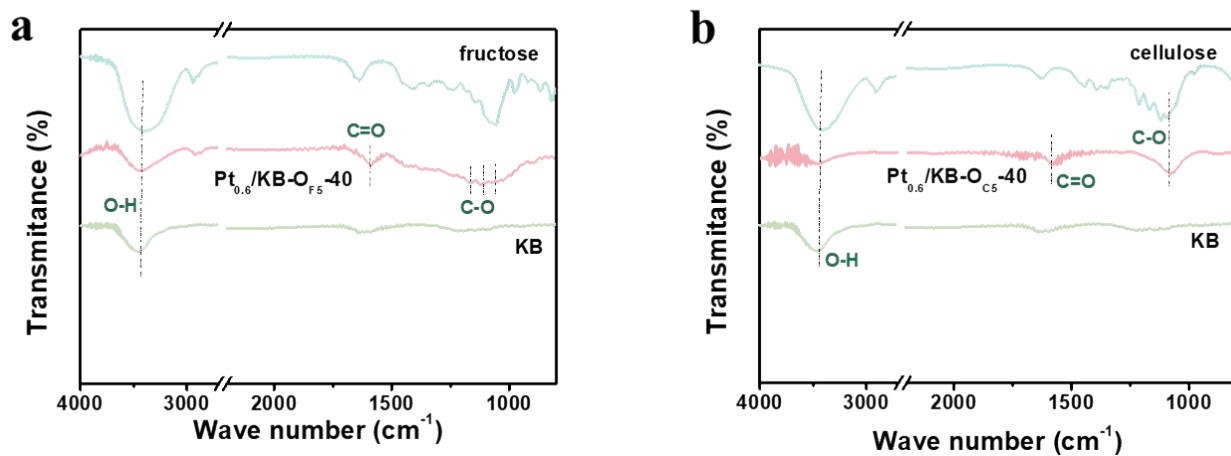

**Figure S8.** FTIR spectra of (a) Pt<sub>0.6</sub>/KB-O<sub>F5</sub>-40 and (b) Pt<sub>0.6</sub>/KB-O<sub>C5</sub>-40.



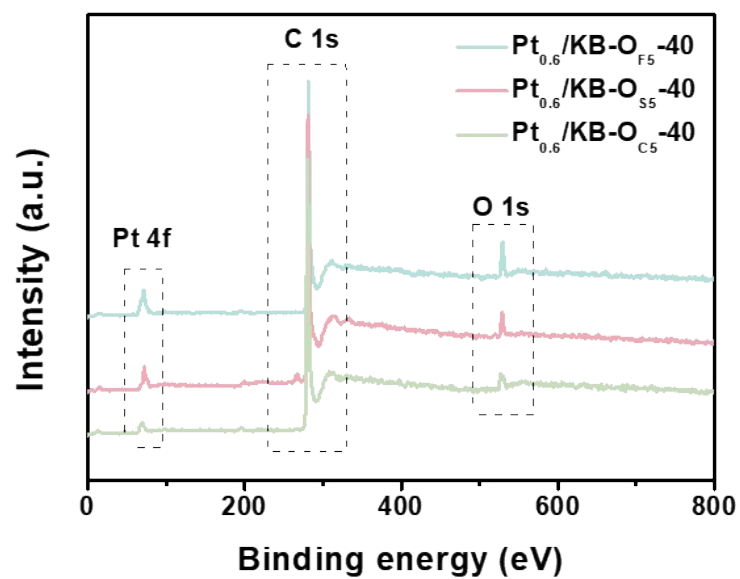

**Figure S9.** XPS spectra of Pt<sub>0.6</sub>/KB-O<sub>F5</sub>-40, Pt<sub>0.6</sub>/KB-O<sub>S5</sub>-40 and Pt<sub>0.6</sub>/KB-O<sub>C5</sub>-40.

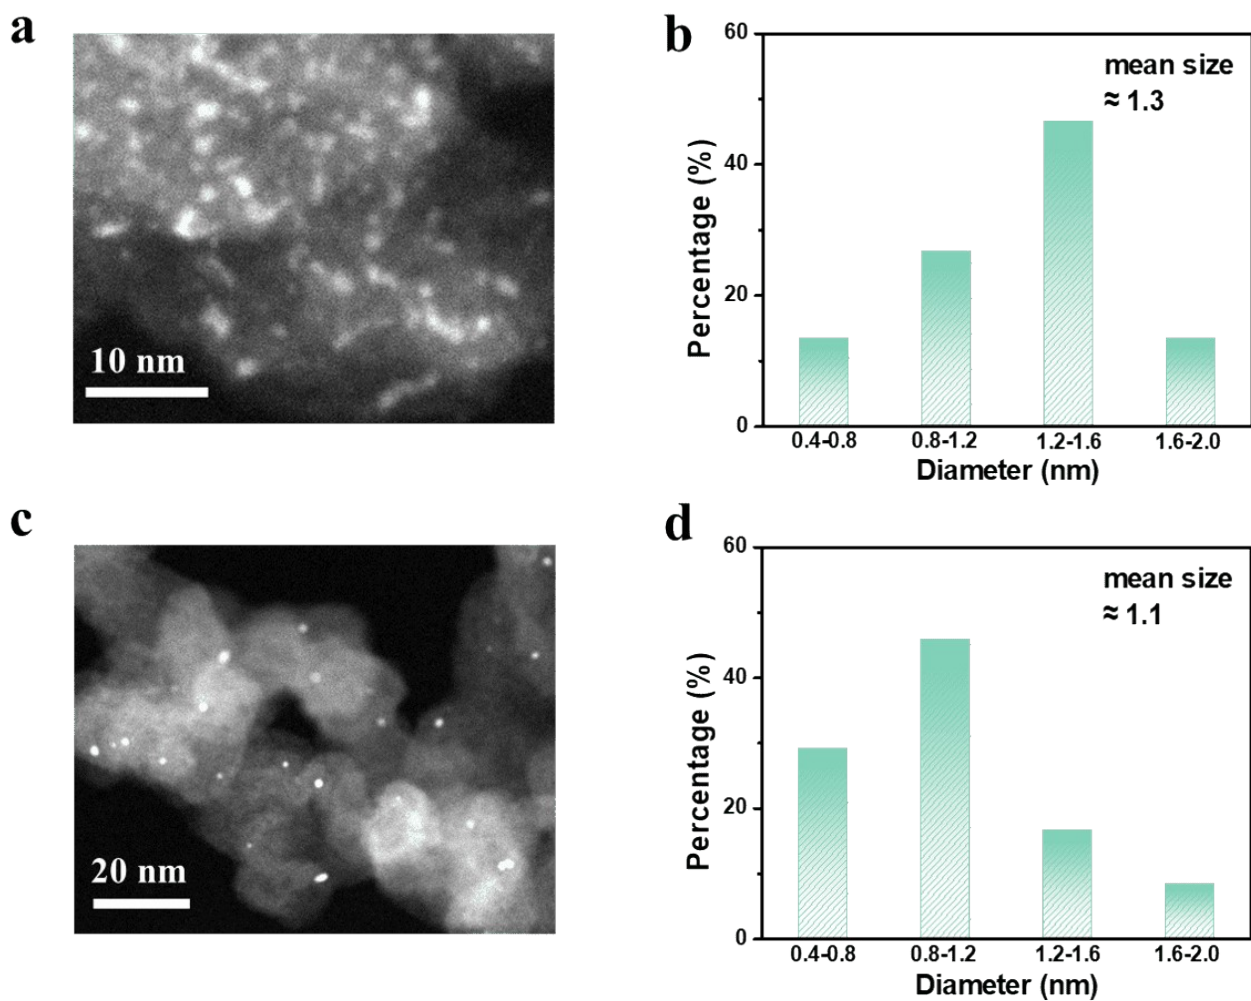

**Figure S10.** (a) HAADF-STEM image and (b) corresponding size distributions for  $\text{Pt}_{0.6}/\text{KB-O}_{\text{F5}}\text{-40}$ . (c) HAADF-STEM image and (d) corresponding size distributions for  $\text{Pt}_{0.6}/\text{KB-O}_{\text{C5}}\text{-40}$ .

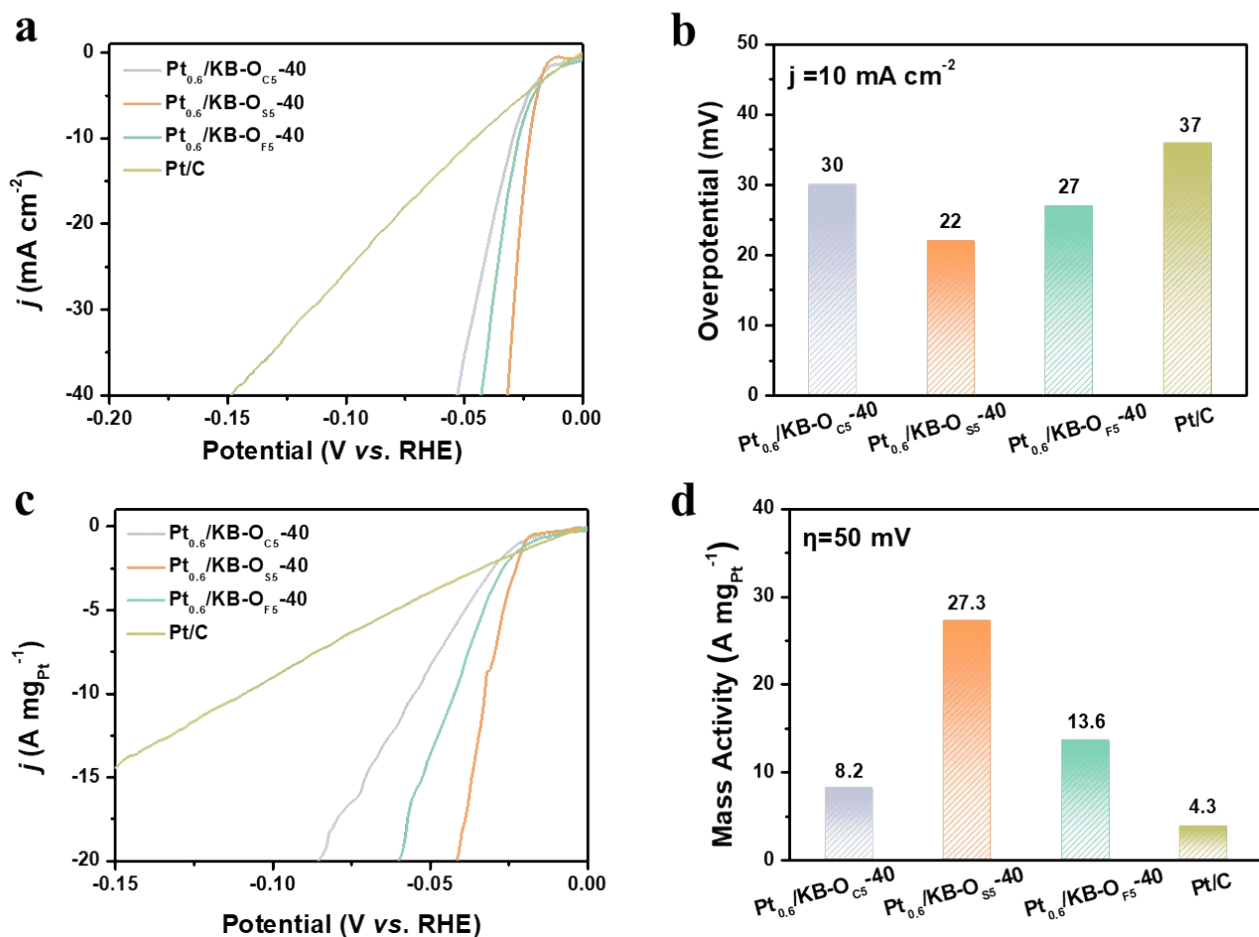

**Figure S11.** (a) LSV curves of Pt<sub>0.6</sub>/KB-O<sub>C5</sub>-40, Pt<sub>0.6</sub>/KB-O<sub>S5</sub>-40, Pt<sub>0.6</sub>/KB-O<sub>F5</sub>-40 and commercial Pt/C in a N<sub>2</sub>-saturated 0.5 M H<sub>2</sub>SO<sub>4</sub>. (b) Comparison  $\eta_{10}$  of Pt<sub>0.6</sub>/KB-O<sub>C5</sub>-40, Pt<sub>0.6</sub>/KB-O<sub>S5</sub>-40, Pt<sub>0.6</sub>/KB-O<sub>F5</sub>-40 and commercial Pt/C. (c) LSV curves with the current density normalized to the Pt mass. (d) The mass activity of Pt<sub>0.6</sub>/KB-O<sub>C5</sub>-40, Pt<sub>0.6</sub>/KB-O<sub>S5</sub>-40, Pt<sub>0.6</sub>/KB-O<sub>F5</sub>-40 and commercial Pt/C at the overpotential of 50 mV.

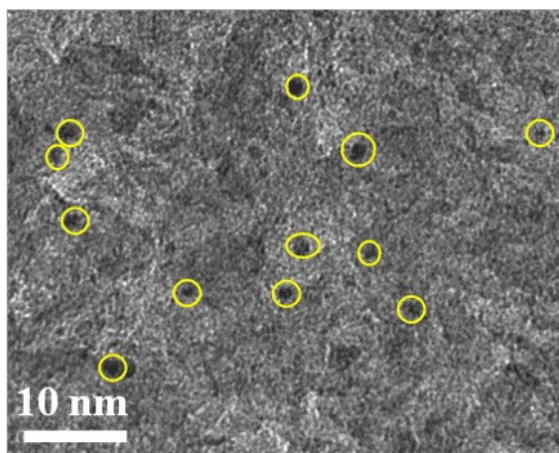

**Figure S12.** HRTEM image of  $\text{Pt}_{0.6}/\text{KB-O}_{\text{S20-40}}$ .

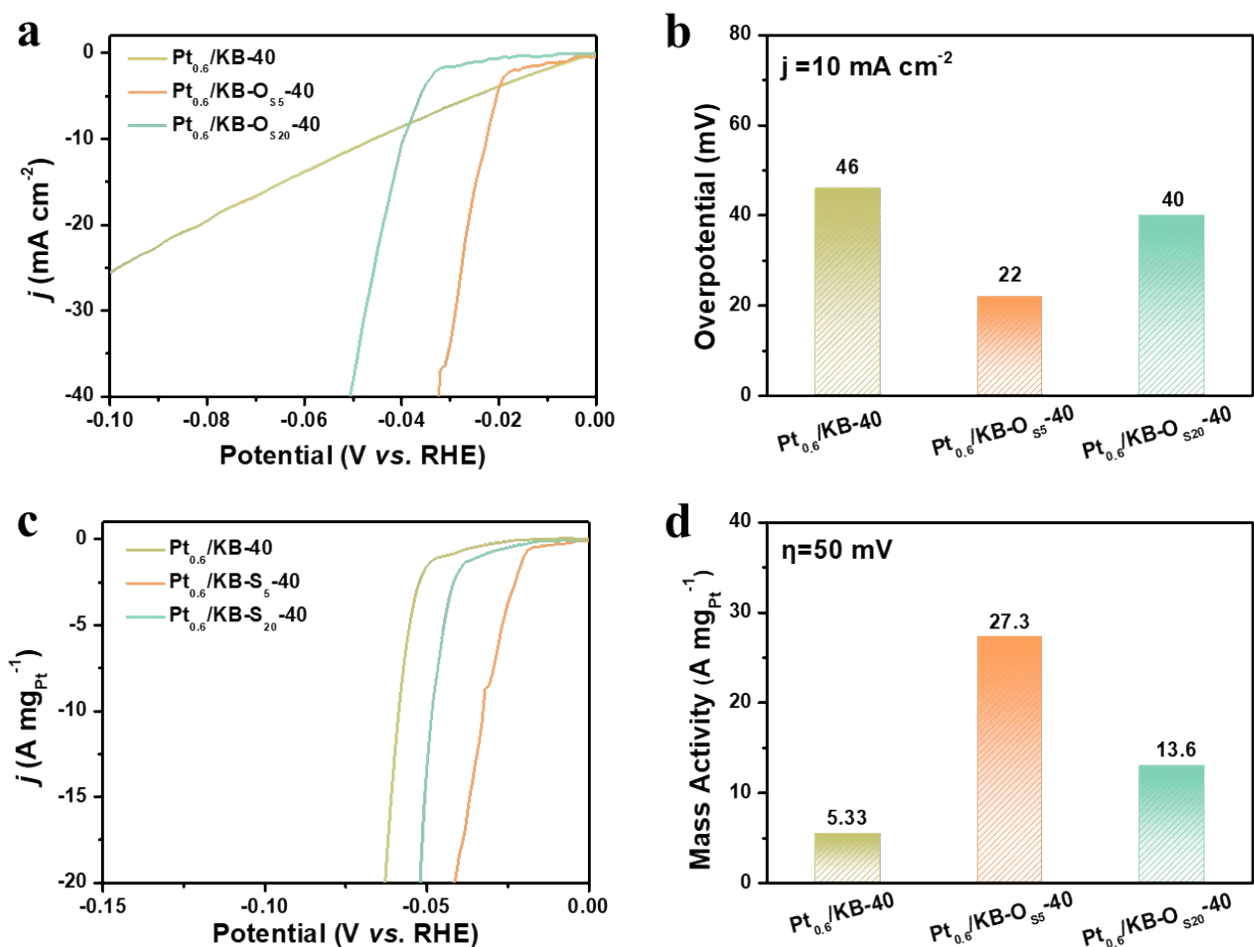

**Figure S13.** (a) LSV curves of Pt<sub>0.6</sub>/KB-40, Pt<sub>0.6</sub>/KB-O<sub>S5</sub>-40 and Pt<sub>0.6</sub>/KB-O<sub>S20</sub>-40 in 0.5 M H<sub>2</sub>SO<sub>4</sub>. (b) Comparison  $\eta_{10}$  of Pt<sub>0.6</sub>/KB-40, Pt<sub>0.6</sub>/KB-O<sub>S5</sub>-40 and Pt<sub>0.6</sub>/KB-O<sub>S20</sub>-40. (c) LSV curves of the HER with the current density normalized to the Pt mass. (d) The mass activity of Pt<sub>0.6</sub>/KB-40, Pt<sub>0.6</sub>/KB-O<sub>S5</sub>-40 and Pt<sub>0.6</sub>/KB-O<sub>S20</sub>-40 when the overpotential is 50 mV.

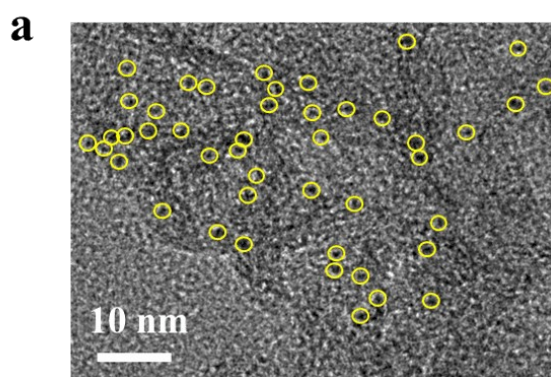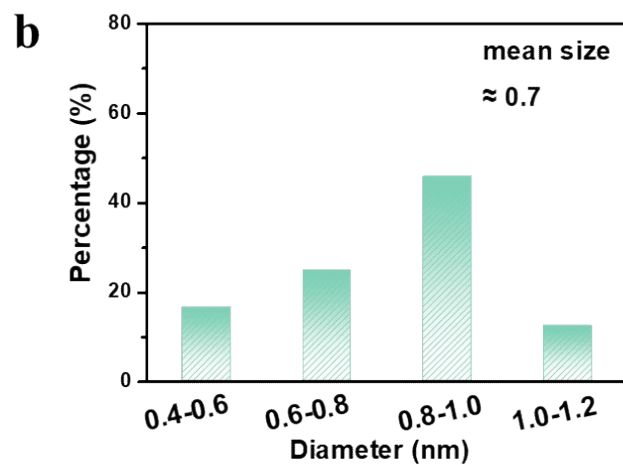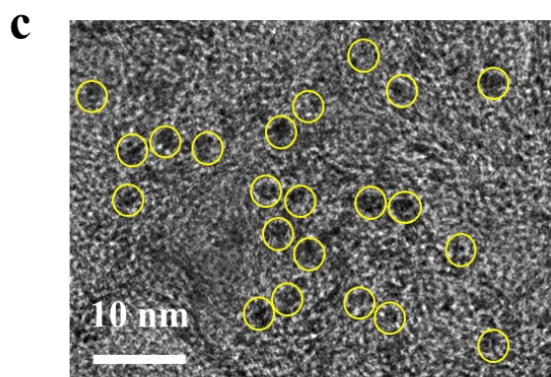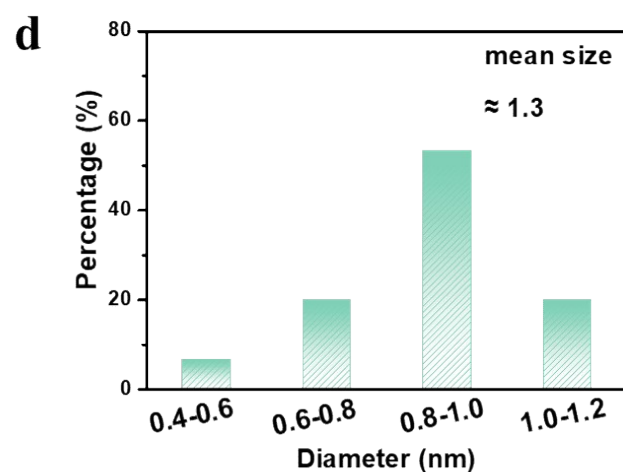

**Figure S14.** (a) HRTEM and (b) corresponding size distributions for  $\text{Pt}_{0.6}/\text{KB-O}_{\text{S5-20}}$ . (c) HRTEM and (d) corresponding size corresponding size distributions for  $\text{Pt}_{0.6}/\text{KB-O}_{\text{S5-60}}$ .

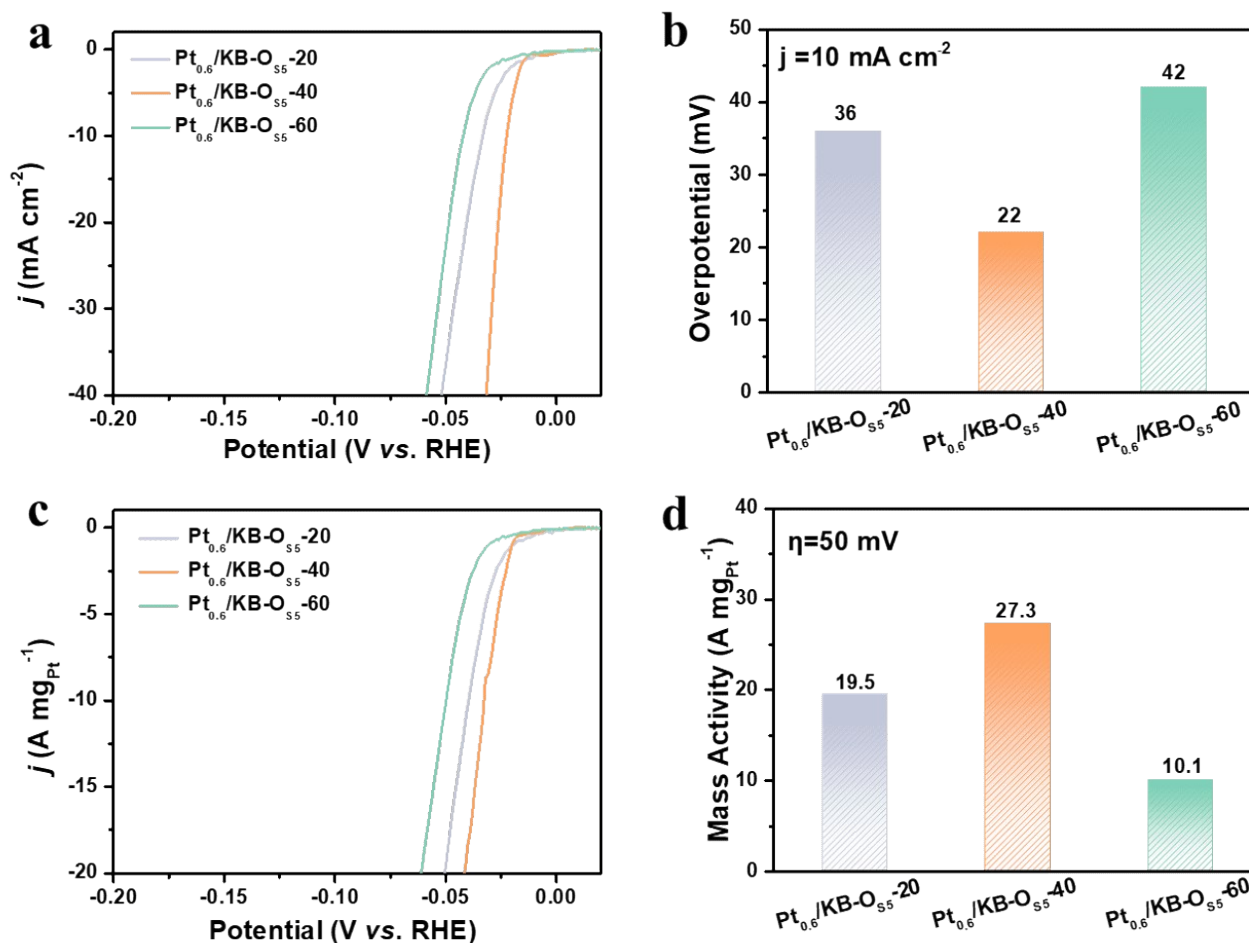

**Figure S15.** (a) LSV curves of Pt<sub>0.6</sub>/KB-O<sub>SS</sub>-20, Pt<sub>0.6</sub>/KB-O<sub>SS</sub>-40 and Pt<sub>0.6</sub>/KB-O<sub>SS</sub>-60 in a N<sub>2</sub>-saturated in 0.5 M H<sub>2</sub>SO<sub>4</sub>. (b) Comparison  $\eta_{10}$  of Pt<sub>0.6</sub>/KB-O<sub>SS</sub>-20, Pt<sub>0.6</sub>/KB-O<sub>SS</sub>-40 and Pt<sub>0.6</sub>/KB-O<sub>SS</sub>-60. (c) LSV curves of the HER with the current density normalized to the Pt mass. (d) The mass activity of Pt<sub>0.6</sub>/KB-O<sub>SS</sub>-20, Pt<sub>0.6</sub>/KB-O<sub>SS</sub>-40 and Pt<sub>0.6</sub>/KB-O<sub>SS</sub>-60 when the overpotential is 50 mV.



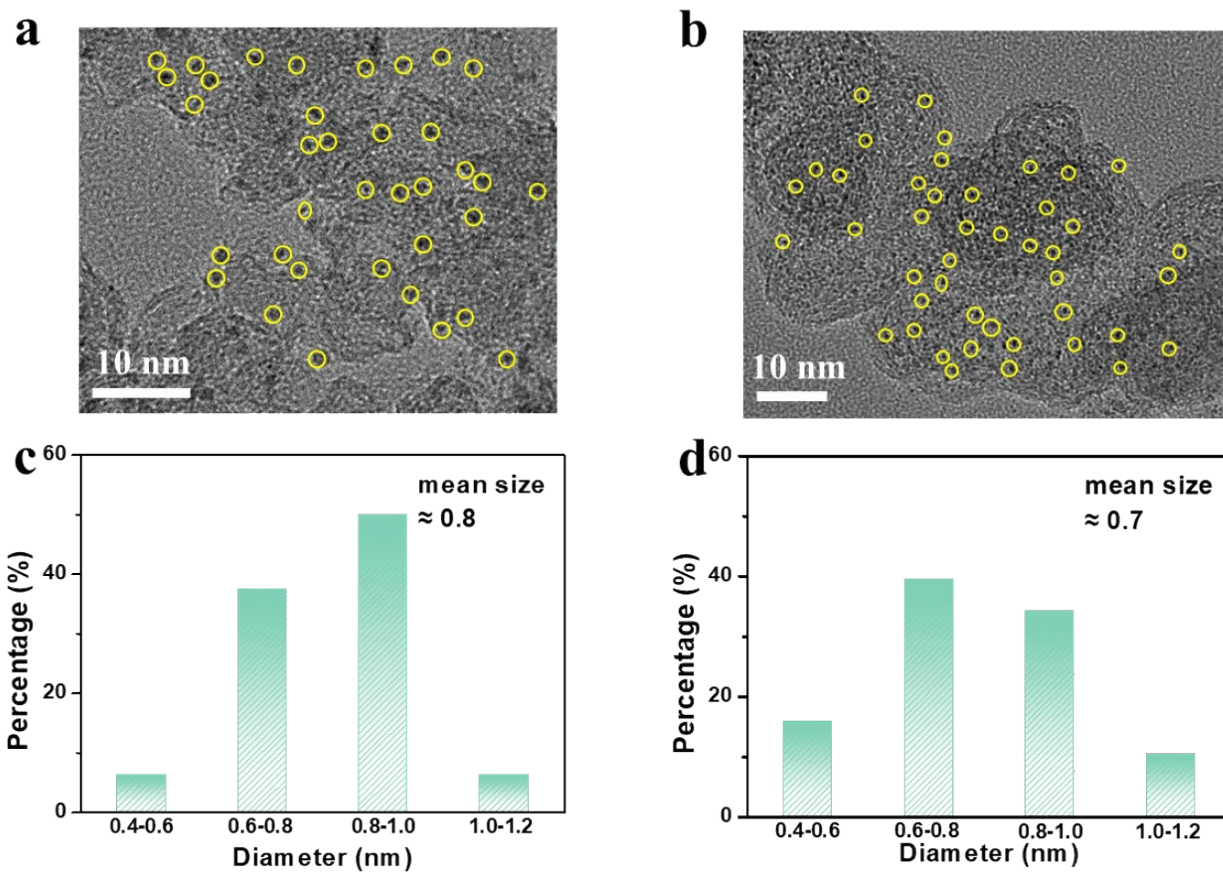

**Figure S16.** The HRTEM images of (a)  $\text{Pd}_{0.6}/\text{KB-O}_{\text{SS}}\text{-40}$  and (b)  $\text{Ru}_{0.6}/\text{KB-O}_{\text{SS}}\text{-40}$ . Corresponding size distributions for the (c)  $\text{Pd}_{0.6}/\text{KB-O}_{\text{SS}}\text{-40}$  and (d)  $\text{Ru}_{0.6}/\text{KB-O}_{\text{SS}}\text{-40}$ .



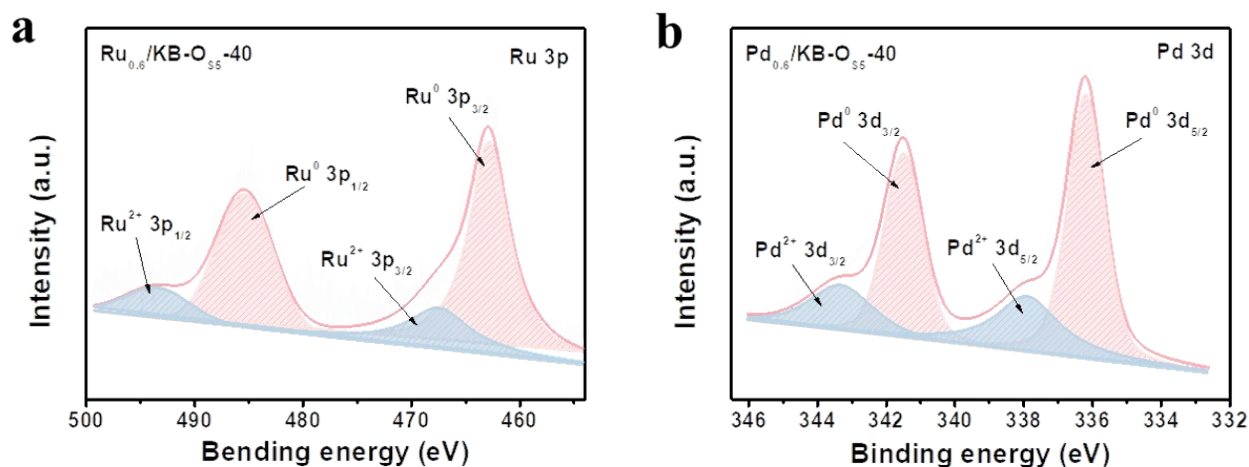

**Figure S17.** (a) High-resolution Ru 3p XPS spectrum for Ru<sub>0.6</sub>/KB-O<sub>55</sub>-40. (b) High-resolution Pd 3d XPS spectrum for Pd<sub>0.6</sub>/KB-O<sub>55</sub>-40.

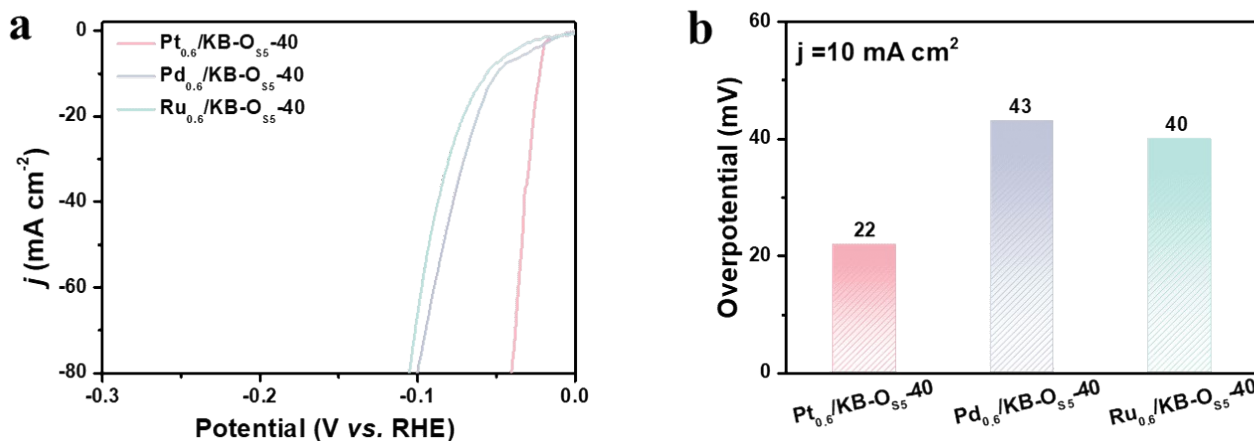

**Figure S18.** (a) LSV curves of Pt<sub>0.6</sub>/KB-O<sub>55</sub>-40, Pd<sub>0.6</sub>/KB-O<sub>55</sub>-40 and Ru<sub>0.6</sub>/KB-O<sub>55</sub>-40 in 0.5 M H<sub>2</sub>SO<sub>4</sub>. (b) Comparison of  $\eta_{10}$  of Pt<sub>0.6</sub>/KB-O<sub>55</sub>-40, Pd<sub>0.6</sub>/KB-O<sub>55</sub>-40 and Ru<sub>0.6</sub>/KB-O<sub>55</sub>-40.

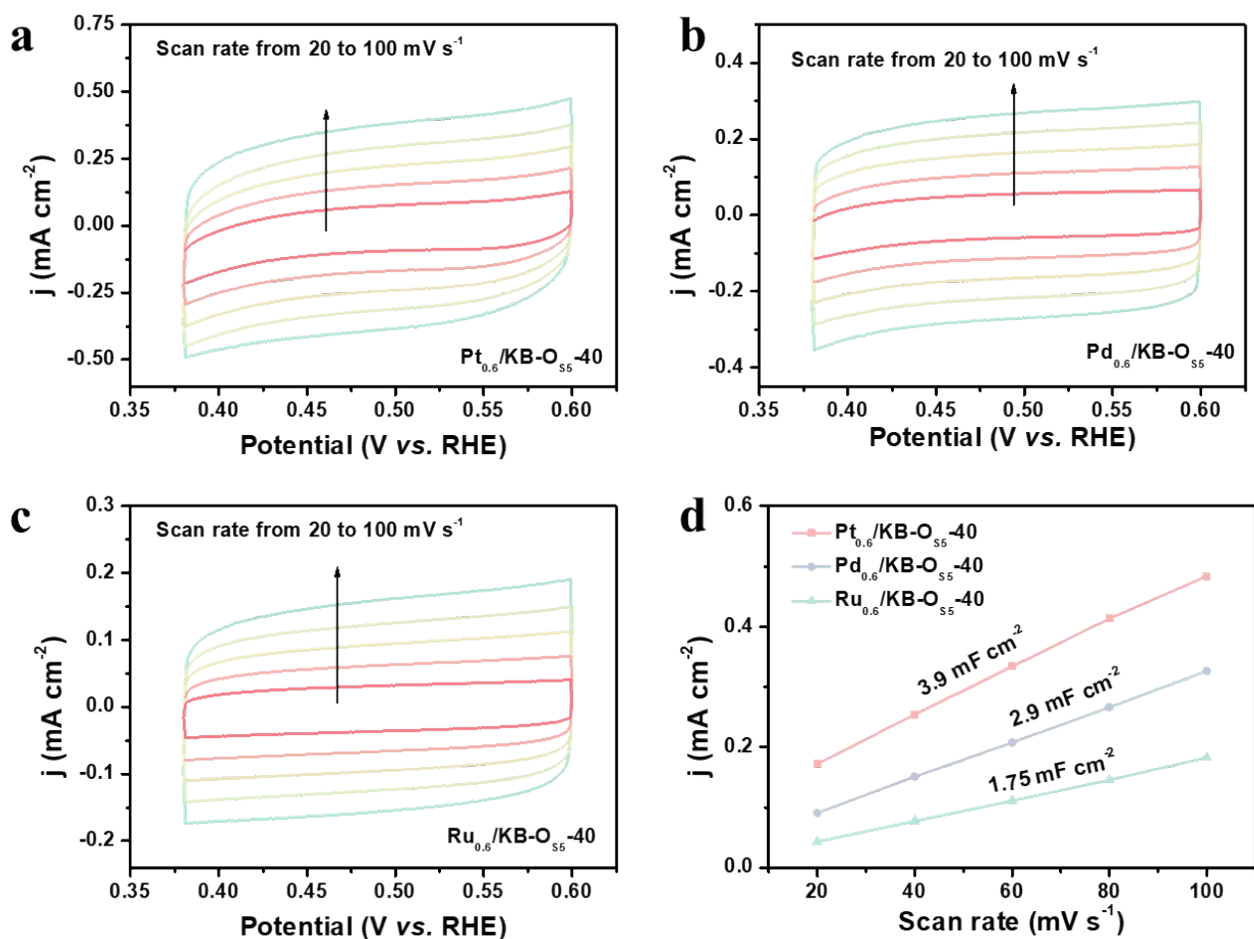

**Figure S19.** CV curves measured at different scan rates from 20 to 100  $\text{mV s}^{-1}$  in 0.5 M  $\text{H}_2\text{SO}_4$  for (a)  $\text{Pt}_{0.6}/\text{KB-O}_{\text{SS}}-40$ , (b)  $\text{Pd}_{0.6}/\text{KB-O}_{\text{SS}}-40$  and (c)  $\text{Ru}_{0.6}/\text{KB-O}_{\text{SS}}-40$ . (d) Capacitive current at middle potential of CV curves as function of scan rates for  $\text{Pt}_{0.6}/\text{KB-O}_{\text{SS}}-40$ ,  $\text{Pd}_{0.6}/\text{KB-O}_{\text{SS}}-40$  and  $\text{Ru}_{0.6}/\text{KB-O}_{\text{SS}}-40$ .

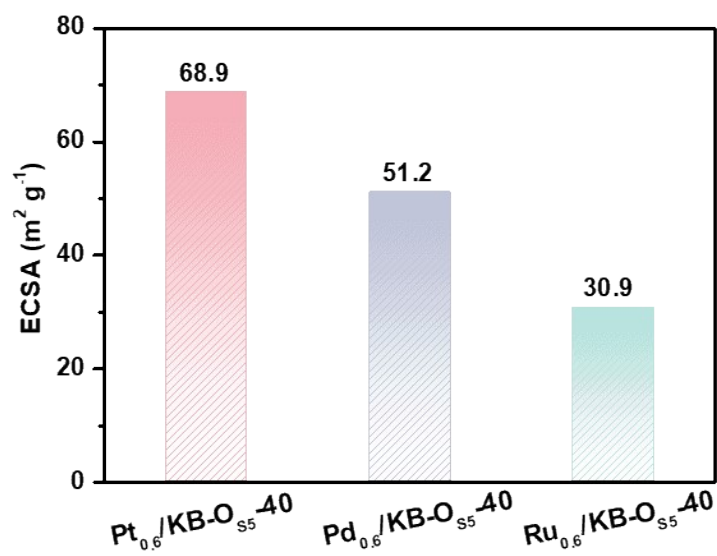

**Figure S20.** Estimation of the ECSA of  $\text{Pt}_{0.6}/\text{KB-O}_{\text{S5}}-40$ ,  $\text{Pd}_{0.6}/\text{KB-O}_{\text{S5}}-40$  and  $\text{Ru}_{0.6}/\text{KB-O}_{\text{S5}}-40$ .

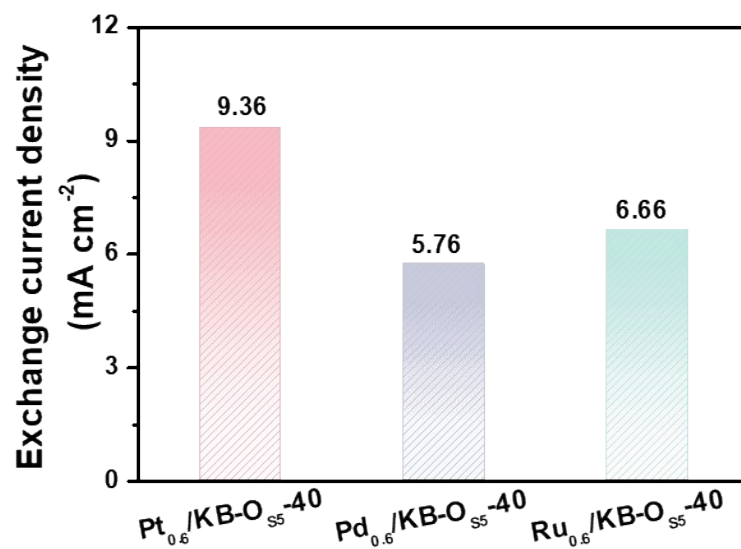

**Figure S21.** Exchange current density of  $\text{Pt}_{0.6}/\text{KB-O}_{\text{S5}}-40$ ,  $\text{Pd}_{0.6}/\text{KB-O}_{\text{S5}}-40$  and  $\text{Ru}_{0.6}/\text{KB-O}_{\text{S5}}-40$ .

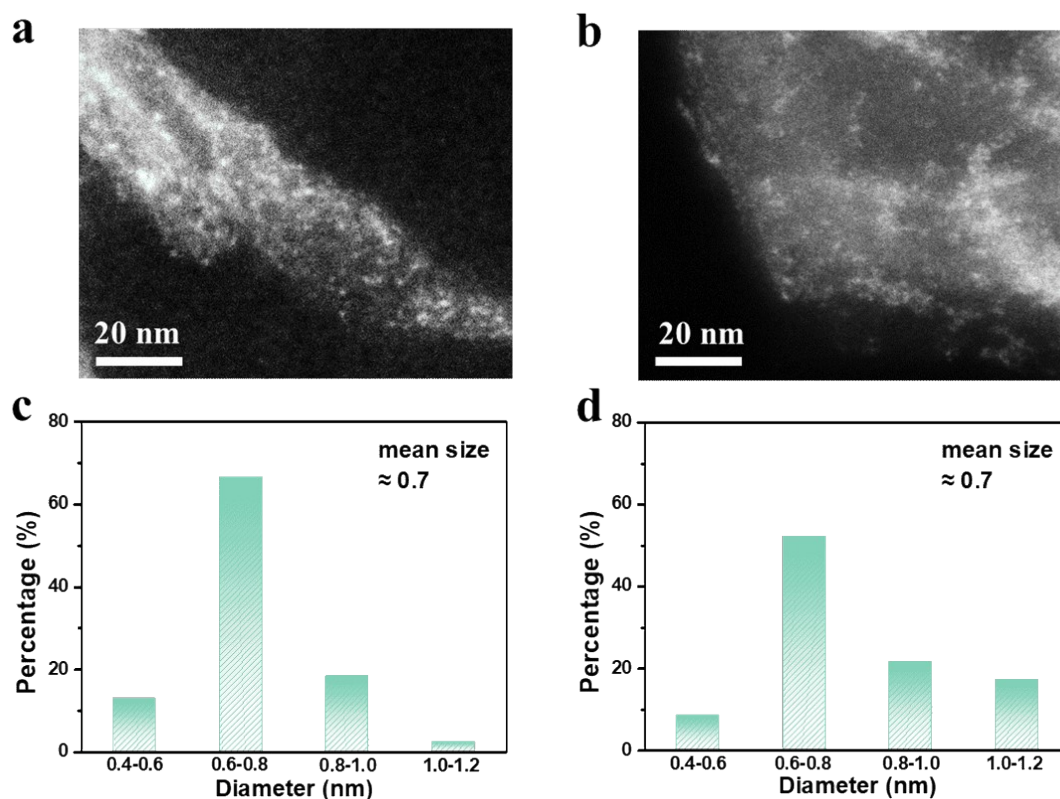

**Figure S22.** The HAADF-STEM images of (a) Pt<sub>0.6</sub>/CNT-OS<sub>5</sub>-40 and (b) Pt<sub>0.6</sub>/rGO-OS<sub>5</sub>-40. Corresponding size distributions for the (c) Pt<sub>0.6</sub>/CNT-OS<sub>5</sub>-40 and (d) Pt<sub>0.6</sub>/rGO-OS<sub>5</sub>-40.

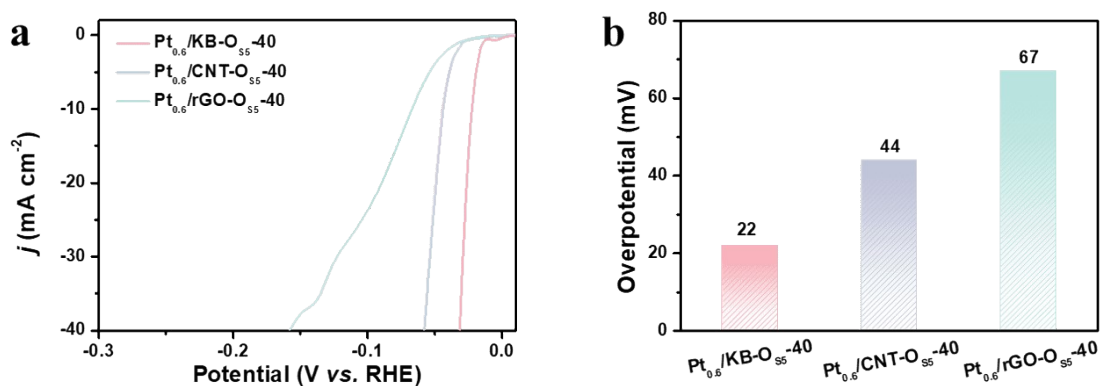

**Figure S23.** (a) LSV curves of Pt<sub>0.6</sub>/CNT-OS<sub>5</sub>-40, Pt<sub>0.6</sub>/KB-OS<sub>5</sub>-40 and Pt<sub>0.6</sub>/rGO-OS<sub>5</sub>-40 in 0.5 M H<sub>2</sub>SO<sub>4</sub>. (b) Comparison of η<sub>10</sub> of Pt<sub>0.6</sub>/CNT-OS<sub>5</sub>-40, Pt<sub>0.6</sub>/KB-OS<sub>5</sub>-40 and Pt<sub>0.6</sub>/rGO-OS<sub>5</sub>-40.

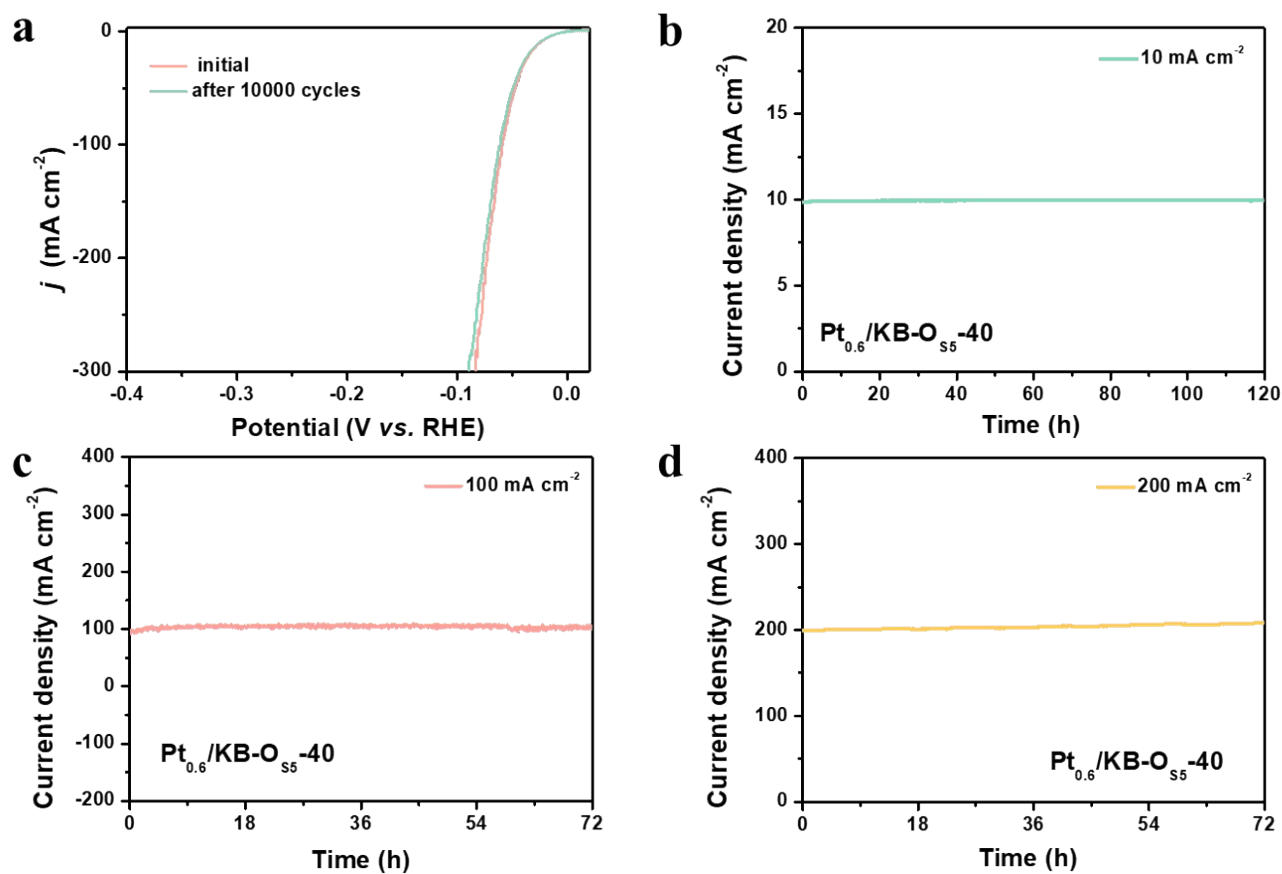

**Figure S24.** (a) LSV of HER of  $\text{Pt}_{0.6}/\text{KB-O}_{\text{S5}}-40$  before and after 10,000 CV cycles. The current-time (i-t) curve of  $\text{Pt}_{0.6}/\text{KB-O}_{\text{S5}}-40$  under the temporal evolution of the potential required to maintain (b)  $10 \text{ mA cm}^{-2}$ , (c)  $100 \text{ mA cm}^{-2}$  and (d)  $200 \text{ mA cm}^{-2}$ .

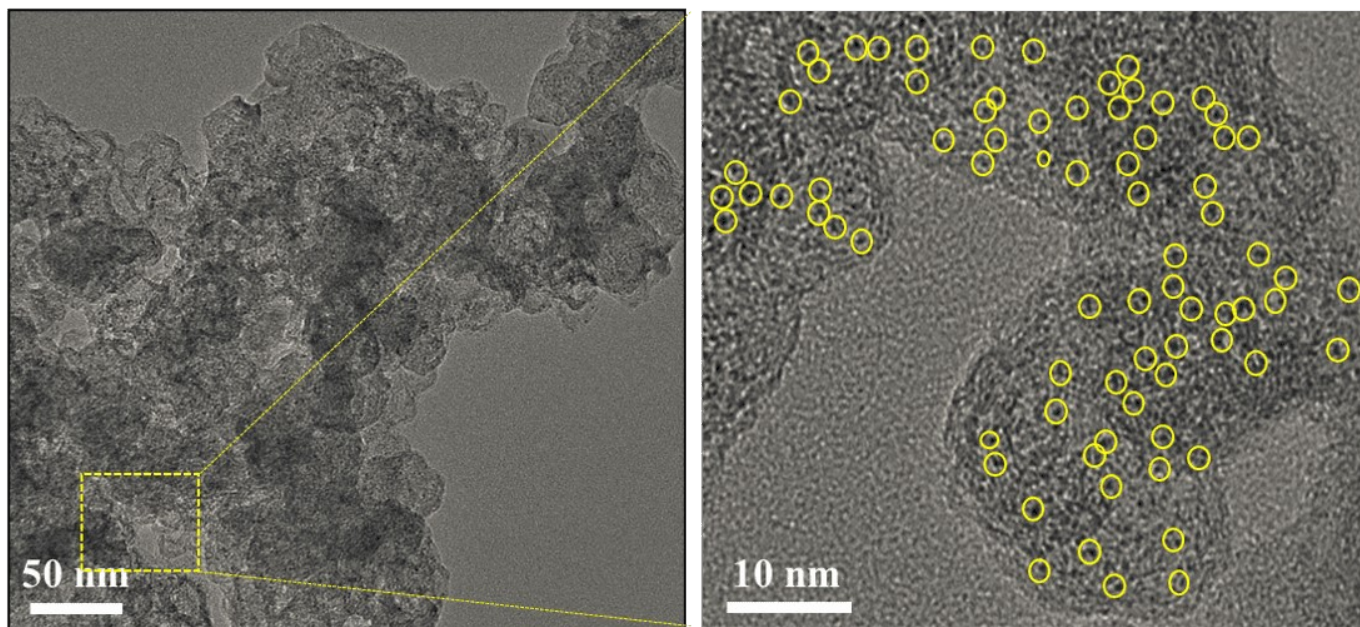

**Figure S25.** The HRTEM images of  $\text{Pt}_{0.6}/\text{KB-O}_{\text{S5-40}}$  after ADT test in 0.5 M  $\text{H}_2\text{SO}_4$ .

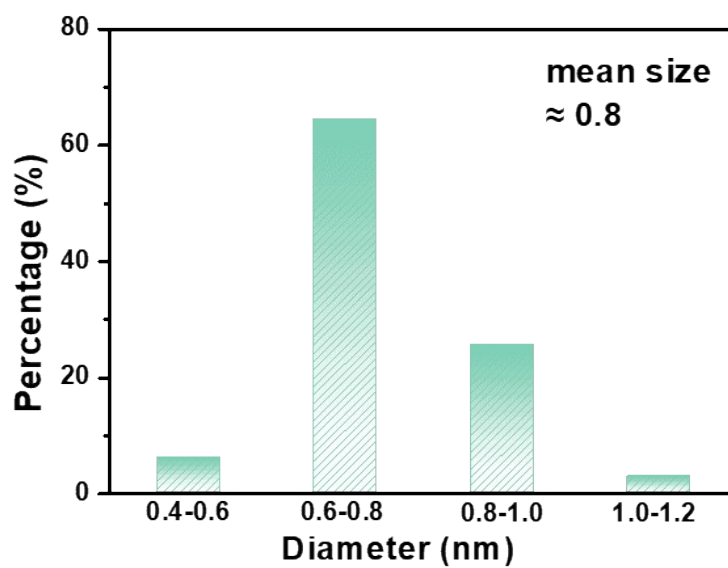

**Figure S26.** Corresponding size distributions for the  $\text{Pt}_{0.6}/\text{KB-O}_{\text{S5-40}}$  after ADT test.

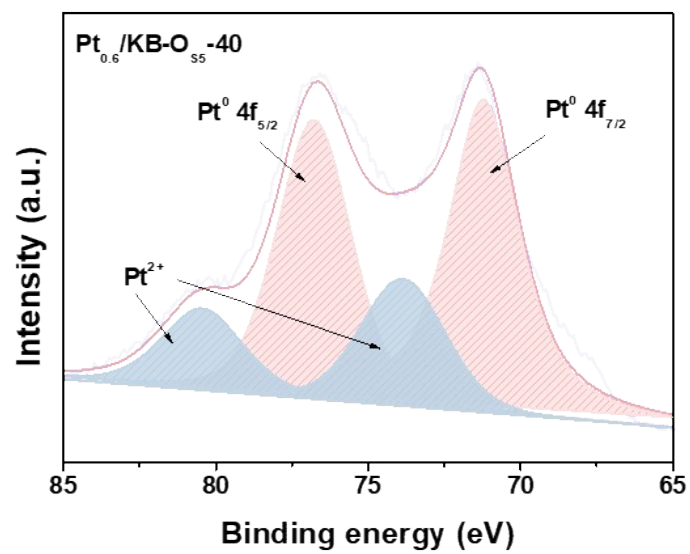

**Figure S27.** High-resolution Pt 4f XPS spectrum for Pt<sub>0.6</sub>/KB-O<sub>55</sub>-40 after stability test.



**Table S1.** Mass fraction of different Pt/KB-S.

| <i>Material</i>                            | <i>Metal loading (wt%)</i> |
|--------------------------------------------|----------------------------|
| Pt <sub>0.6</sub> /KB-O <sub>S5</sub> -40  | 47.1                       |
| Pt <sub>0.4</sub> /KB-O <sub>S5</sub> -40  | 28.2                       |
| Pt <sub>0.8</sub> /KB-O <sub>S5</sub> -40  | 48.2                       |
| Pt <sub>0.6</sub> /KB-O <sub>S5</sub> -20  | 28.5                       |
| Pt <sub>0.6</sub> /KB-O <sub>S5</sub> -60  | 40.0                       |
| Pt <sub>0.6</sub> /KB-40                   | 12.3                       |
| Pt <sub>0.6</sub> /KB-O <sub>S20</sub> -40 | 49.8                       |

**Table S2.** Metal loading of different functional groups, noble metals and carbon supports.

| <i>Material</i>                            | <i>Metal loading (wt%)</i> |
|--------------------------------------------|----------------------------|
| Pt <sub>0.6</sub> /KB-N <sub>M5</sub> -40  | 33.2                       |
| Pt <sub>0.6</sub> /KB-S <sub>T5</sub> -40  | 35.7                       |
| Pt <sub>0.6</sub> /KB-O <sub>F5</sub> -40  | 36.2                       |
| Pt <sub>0.6</sub> /KB-O <sub>C5</sub> -40  | 29.6                       |
| Pd <sub>0.6</sub> /KB-O <sub>S5</sub> -40  | 38.9                       |
| Ru <sub>0.6</sub> /KB-O <sub>S5</sub> -40  | 41.5                       |
| Pt <sub>0.6</sub> /CNT-O <sub>S5</sub> -40 | 40.7                       |
| Pt <sub>0.6</sub> /rGO-O <sub>S5</sub> -40 | 41.8                       |



**Table S3.** HER performance of Pt<sub>0.6</sub>/KB-O<sub>SS</sub>-40 and other reported Pt-based catalysts in acidic medium.

| <i>Samples</i>                                                    | <i>Overpotential<br/>(mV@ mA cm<sup>-2</sup>)</i> | <i>Pt<br/>loading<br/>(wt%)</i> | <i>Mass<br/>activity (A/mg@<br/>overpotential)</i> | <i>Tafel<br/>slope (mV<br/>dec<sup>-1</sup>)</i> | <i>Referenc<br/>es</i> |
|-------------------------------------------------------------------|---------------------------------------------------|---------------------------------|----------------------------------------------------|--------------------------------------------------|------------------------|
| Pt <sub>0.6</sub> /KB-O <sub>SS</sub> -40                         | 22@10                                             | 47.1%                           | 27.3@50 mV                                         | 21.9                                             | this work              |
| Pt-AC/DG                                                          | 41@10                                             | 1.0%                            | 15.6@50 mV                                         | 28                                               | 1                      |
| Pt/SWCNT-400                                                      | 27@10                                             | 19.4%                           | 1.1@50 mV                                          | 38                                               | 2                      |
| Pt <sub>1</sub> /hNCNC                                            | 15@10                                             | 0.3%                            | 7.6@20 mV                                          | 28                                               | 3                      |
| Pt <sub>1</sub> /NPC                                              | 25@10                                             | 0.3%                            | 2.9@25 mV                                          | 28                                               | 4                      |
| Pt/CNTs-ECR                                                       | 34@10                                             | 0.2%                            | 65@50 mV                                           | 26                                               | 5                      |
| Pt <sub>1</sub> /MoO <sub>3-x</sub> /C                            | 23@10                                             | 2.0%                            | 3.5@25 mV                                          | 28                                               | 6                      |
| PtCoFe@CN                                                         | 45@10                                             | 1.3%                            | 1.4@50mV                                           | ---                                              | 7                      |
| ALD <sub>50</sub> Pt/NGNs                                         | 41@10                                             | 1.6%                            | 10.1@50 mV                                         | ---                                              | 8                      |
| Pt@NHPCP                                                          | 57@10                                             | 0.2%                            | 5.0@50 mV                                          | ---                                              | 9                      |
| PtO <sub>x</sub> /TiO <sub>2</sub>                                | ---                                               | 1.4%                            | 15@50 mV                                           | 31                                               | 10                     |
| Pt@PCM                                                            | 19@10                                             | 0.1%                            | ---                                                | 63.7                                             | 11                     |
| Mo <sub>2</sub> TiC <sub>2</sub> T <sub>x</sub> -Pt <sub>SA</sub> | 15@10                                             | 2.4%                            | 1.3@10 mV                                          | 30                                               | 12                     |
| Pt-graphdiyne                                                     | 66@100                                            | 0.9%                            | 2.3@100 mV                                         | 47                                               | 13                     |
| PtO <sub>x</sub> /TiO <sub>2</sub>                                | ---                                               | 1.4%                            | 8.7@50 mV                                          | 40                                               | 10                     |
| MoS <sub>2</sub> @Pt                                              | 70@10                                             | 3.4%                            | 4.1@10 mV                                          | 36                                               | 14                     |
| Pt <sub>1</sub> /MoO <sub>3-x</sub> /C                            | 23@10                                             | 4.1%                            | ---                                                | 29                                               | 6                      |
| Pt-MoS <sub>2</sub>                                               | 53@10                                             | 5.3%                            | 2.0@10 mV                                          | 40                                               | 15                     |
| WC@C@Pt                                                           | 30@10                                             | 13.9%                           | 0.4@10 mV                                          | 26                                               | 16                     |
| Pt-CNSs/rGO                                                       | 75@10                                             | 15.8%                           | 0.9@10 mV                                          | 29                                               | 17                     |
| PtNiCu                                                            | 25@10                                             | 10.7%                           | 0.5@10 mV                                          | 28                                               | 18                     |
| Pt <sub>66</sub> Ni <sub>34</sub><br>nanoflowers                  | 43@10                                             | 4.0%                            | 0.3@10 mV                                          | 33                                               | 19                     |
| Pt/MoS <sub>2</sub>                                               | 86@10                                             | 1.3%                            | 1.3@10 mV                                          | 52                                               | 20                     |
| Pt <sub>2.6</sub> Co <sub>1</sub><br>nanoflowers                  | 40@10                                             | 15.0%                           | 0.3@10 mV                                          | 42                                               | 21                     |

## References:

1. Q. Cheng, C. Hu, G. Wang, Z. Zou, H. Yang and L. Dai, Carbon-defect-driven electroless deposition of Pt atomic clusters for highly efficient hydrogen evolution, *J. Am. Chem. Soc.*, 2020, **142**, 5594-5601.
2. M. Tavakkoli, N. Holmberg, R. Kronberg, H. Jiang, J. Sainio, E. I. Kauppinen, Tanja Kallio and K. Laasonen, Electrochemical activation of single-walled carbon nanotubes with pseudo-atomic-scale platinum for the hydrogen evolution reaction, *ACS Catal.*, 2017, **7**, 3121-3130.
3. Z. Zhang, Y. Chen, L. Zhou, C. Chen, Z. Han, B. Zhang, Q. Wu, L. Yang, L. Du, Y. Bu, P. Wang, X. Wang, H. Yang and Z. Hu, The simplest construction of single-site catalysts by the synergism of micropore trapping and nitrogen anchoring, *Nat. Commun.*, 2019, **10**, 1657.
4. T. Li, J. Liu, Y. Song and F. Wang, Photochemical solid-phase synthesis of platinum single atoms on nitrogen-doped carbon with high loading as bifunctional catalysts for hydrogen evolution and oxygen reduction reactions., *ACS Catal.*, 2018, **8**, 8450-8458.
5. X. Bao, Y. Gong, Y. Chen, H. Zhang, Z. Wang, S. Mao, L. Xie, Z. Jiang and Y. Wang, Carbon vacancy defect-activated Pt cluster for hydrogen generation, *J. Mater. Chem. A*, 2019, **7**, 15364-15370.
6. W. Liu, Q. Xu, P. Yan, J. Chen, Y. Du, S. Chu and J. Wang, Fabrication of a single-atom platinum catalyst for the hydrogen evolution reaction: A new protocol by utilization of  $H_xMoO_{3-x}$  with plasmon resonance, *ChemCatChem*, 2018, **10**, 946-950.
7. J. Chen, Y. Yang, J. Su, P. Jiang, G. Xia and Q. Chen, Enhanced activity for hydrogen evolution reaction over CoFe catalysts by alloying with small amount of Pt, *ACS Appl. Mater. Interfaces.*, 2017, **9**, 3596-3601.
8. N. Cheng, S. Stambula, D. Wang, M. N. Banis, J. Liu, A. Riese, B. Xiao, R. Li, T. K. Sham, L. M. Liu, G. A. Botton and X. Sun, Platinum single-atom and cluster catalysis of the hydrogen evolution reaction, *Nat. Commun.*, 2016, **7**, 13638.
9. J. Ying, G. Jiang, Z. P. Cano, L. Han, X. Yang and Z. Chen, Nitrogen-doped hollow porous carbon polyhedrons embedded with highly dispersed Pt nanoparticles as a highly efficient and stable hydrogen evolution electrocatalyst, *Nano Energy*, 2017, **40**, 88-94.
10. C. Xing, Y. Li, L. Zheng, Y. Yan, Y. Zhang, G. Chen, S. Sun and J. Zhang, Highly active, stable oxidized platinum clusters as electrocatalysts for the hydrogen evolution reaction., *Energy Environ. Sci.*, 2017, **10**, 2450-2458.
11. H. Zhang, P. An, W. Zhou, B. Y. Guan, P. Zhang, J. Dong and X. W. D. Lou, Dynamic traction of lattice-confined platinum atoms into mesoporous carbon matrix for hydrogen evolution reaction., *Sci. Adv.*, 2018, **4**, eaao6657.
12. J. Zhang, Y. Zhao, X. Guo, C. Chen, C.-L. Dong, R.-S. Liu, C.-P. Han, Y. Li, Y. Gogotsi and G. Wang, Single platinum atoms immobilized on an MXene as an efficient catalyst for the hydrogen evolution reaction, *Nat. Catal.*, 2018, **1**, 985-992.
13. X. Yin, H. Wang, S. Tang, X. Lu, S. Miao, R. Si and T. Lu, Engineering the coordination environment of single-atom Pt anchored on graphdiyne for optimizing electrocatalytic hydrogen evolution, *Angew. Chem. Int. Ed.*, 2018, **57**, 9382-9386.
14. X. Xu, X. F. Dong, Z. J. Bao, R. Wang, J. G. Hu and H. B. Zeng, Three electron channels toward two

types of active sites in MoS<sub>2</sub>@Pt nanosheets for hydrogen evolution, *J. Mater. Chem. A*, 2017, **5**, 22654-22661.

15. X. Huang, Z. Zeng, S. Bao, M. Wang, X. Qi, Z. Fan and H. Zhang, Solution-phase epitaxial growth of noble metal nanostructures on dispersible single-layer molybdenum disulfide nanosheets, *Nat. Commun.*, 2013, **4**, 1444.
16. Z. Liu, X. Huo, K. Xi, P. Li, L. Yue, M. Huang, G. Suo, L. Xu, W. Wang and X. Qu, Thickness controllable and mass produced WC@C@Pt hybrid for efficient hydrogen production., *Energy Storage Mater.*, 2018, **10**, 268-274.
17. G. Xu, J. Hui, T. Huang, Y. Chen and J. Lee, Platinum nanocuboids supported on reduced graphene oxide as efficient electrocatalyst for the hydrogen evolution reaction, *J. Power Sources*, 2015, **285**, 393-399.
18. C. Xia, Y. Han, C. Gao, Y. Xu, H. Xiaomin, M. Willander and N. Wang, Highly catalytic active PtNiCu nanochains for hydrogen evolution reaction, *Nano Energy*, 2014, **9**, 301-308.
19. X. Huang, X. Zhu, X. Zhang, L. Zhang, J. Feng and A. Wang, Simple solvothermal synthesis of uniform Pt<sub>66</sub>Ni<sub>34</sub> nanoflowers as advanced electrocatalyst to significantly boost the catalytic activity and durability of hydrogen evolution reaction, *Electrochim. Acta*, 2018, **271**, 397-405.
20. W. Ren, H. Zhang and C. Cheng, Ultrafine Pt nanoparticles decorated MoS<sub>2</sub> nanosheets with significantly improved hydrogen evolution activity, *Electrochim. Acta*, 2017, **241**, 316-322.
21. L. Jiang, X. Lin, A. Wang, J. Yuan, J. Feng and X. Li, Facile solvothermal synthesis of monodisperse Pt<sub>2.6</sub>Co<sub>1</sub> nanoflowers with enhanced electrocatalytic activity towards oxygen reduction and hydrogen evolution reactions, *Electrochim. Acta*, 2017, **225**, 525-523.
